# Supplementary material for: Synthesis and performance optimization of ultrathin two-dimensional CoFePt alloy materials via in situ topotactic conversion for the hydrogen evolution reaction
Source: Royal Society of Chemistry journal article supplement (doi:10.1039/c9ta02010a), 2019-01-01
Supplement: c9ta02010a1.pdf [file c9ta02010a1.pdf]

## Supporting Information for

# Synthesis and Performance Optimization of Ultrathin Two-Dimensional CoFePt Alloy Materials via in-situ Topotactic Conversion for Hydrogen Evolution Reaction

Qian Zhang, Yaping Li, Yun Kuang, Ming Jiang, Zhao Cai, Zheng Chang\*, Yingchun Pang\*, Xiaoming Sun

### Experimental Section

#### Materials

Nickel foam, cobaltous nitrate ( $\text{Co}(\text{NO}_3)_2 \cdot 6\text{H}_2\text{O}$ ), ferric nitrate ( $\text{Fe}(\text{NO}_3)_3 \cdot 9\text{H}_2\text{O}$ ), urea ( $\text{CO}(\text{NH}_2)_2$ ) and potassium chloroplatinate ( $\text{K}_2\text{PtCl}_6$ ) were purchased from Aladdin Industrial Co., Ltd. Sodium hydroxide ( $\text{NaOH}$ ) and ethylene glycol were purchased from Sinopharm Chemical Reagent Co., Ltd.

#### Material Synthesis

CoFe-LDHs arrays were synthesized by a hydrothermal method in Teflon-lined stainless-steel autoclaves. As a typical preparation processing, Ni foam was cleaned by HCl solution (~37 wt%) through ultrasound bath for 5 min, and then washed by deionized water and absolute ethanol respectively for 10 min to ensure that the nickel oxide layer on the surface was fully cleaned.  $\text{Co}(\text{NO}_3)_2 \cdot 6\text{H}_2\text{O}$  (0.65 mmol) and  $\text{Fe}(\text{NO}_3)_3 \cdot 9\text{H}_2\text{O}$  (0.2 mmol) and  $\text{CO}(\text{NH}_2)_2$  (10 mmol) were dissolved in deionized water (36.0 mL) to form a homogenous solution. The solution and the pretreated Ni foam were transferred to a Teflon-lined stainless-steel autoclave (45-mL), which then maintained at 120°C for 12 hours. Finally, the brown CoFe LDHs precursor on the nickel foam- was washed by deionized water and dried in vacuum at 120°C for 6 hours.

CoFe alloy nanosheets were synthesized through an *in situ* topotactic reduction. Ethylene glycol (40 mL) and NaOH (1.1g) were firstly dissolved in a 45-mL Teflon-lined stainless-steel autoclave at room temperature and the CoFe-LDHs precursor was transferred into it. Then the autoclave was maintained at 160°C for 12 hours to obtain the dark CoFe alloy on the nickel foam. The obtained product was washed by absolute ethanol for two times, named as CoFe-NS. Later,  $\text{K}_2\text{PtCl}_6$  aqueous solution (0.15mM) was preserved at zero degree, and then CoFe-NS was vertically put in the solution for 20 minutes to synthesize Pt doped CoFe catalyst. The as-synthesized catalyst was

entirely washed by deionized water to remove unreacted  $K_2PtCl_6$ , followed by drying under vacuum for hours, and finally named as CoFePt-1%.

### Measurement

Scanning electron microscopy (SEM) images were taken on a Zeiss SUPRA55 scanning electron microscope with accelerating voltages of 200 kV or 50 kV. High-resolution transmission electron microscope (HRTEM) images and EDS elemental mapping were obtained on a JEOL 2100 high-resolution TEM system with operating at 200 kV. The morphologies of samples were also characterized by a FEI G2 20 transmission electron microscopy (TEM). X-ray powder diffraction (XRD) patterns were recorded on an X-ray diffractometer (Bruker) at a scan rate of  $10 (^{\circ})/\text{min}$  in the range from  $5$  to  $90^{\circ}$ . X-ray photoelectron spectra (XPS) were carried out by using a model of ESCALAB 250 and LabRAM Aramis. Elemental analysis was investigated by an inductively coupled plasma optical emission spectrometry (ICP-OES; Thermo Scientific iCAP 6300).

### Electrochemical measurement

The electrochemical measurements were carried out at room temperature in three-electrode glass cell which connected to an electrochemical workstation (Princeton P4000), using saturated calomel electrode (SCE) as the reference electrode,  $1 \text{ cm}^2$  Pt plate as the counter electrode and the sample with  $1 \text{ cm}^2$  electrode area as the working electrode. Prior to the test measurements,  $H_2$  was bubbled through the electrolyte solution to eliminate the dissolved oxygen and to maintain a fixed Nernst potential for the  $H^+/H_2$  redox couple. Linear sweep voltammetry with a scan rate of  $5 \text{ mV s}^{-1}$  was conducted in  $1 \text{ M KOH}$  solution. AC impedance measurements were carried out in the same configuration under the frequency range of  $10^{-1}$  to  $10^5 \text{ Hz}$  with an AC voltage of  $5 \text{ mV}$ . The electrochemical double layer capacitance was measured in  $1 \text{ M KOH}$  at different scan rates from  $20 \text{ mV s}^{-1}$  to  $200 \text{ mV s}^{-1}$  in the range of  $0.1 \text{ V}$  to  $0.2 \text{ V}$  vs. RHE. As a control sample,  $1 \text{ mg Pt/C}$  commercial catalyst was loaded on the Ni foam by mixing  $2 \text{ ml}$  absolute ethanol and  $20 \mu\text{l}$  of  $5 \text{ wt\%}$  Nafion solution. Then the loaded Pt/C catalyst was dried under infrared lamp and then used in HER test.

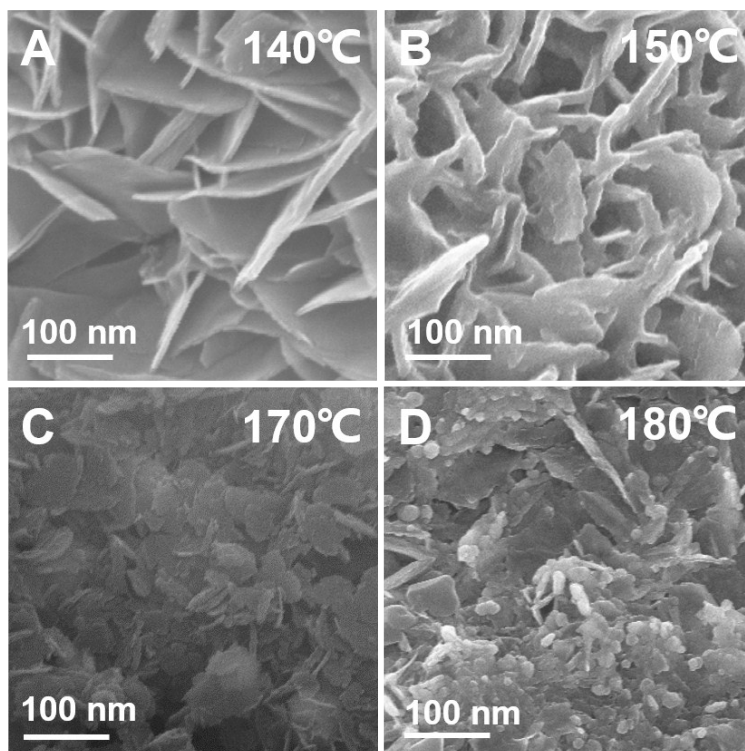

**Figure S1** SEM images of CoFe alloy samples prepared at different temperatures.

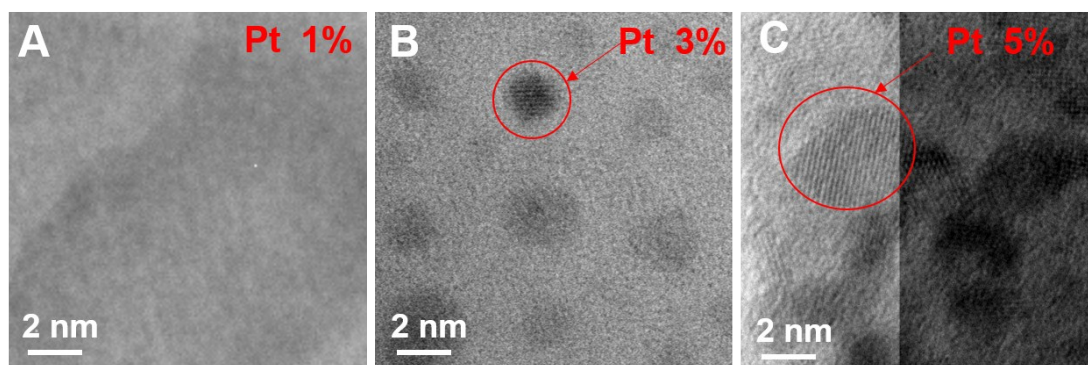

**Figure S2** HRTEM images of CoFePt samples with different Pt loading contents.

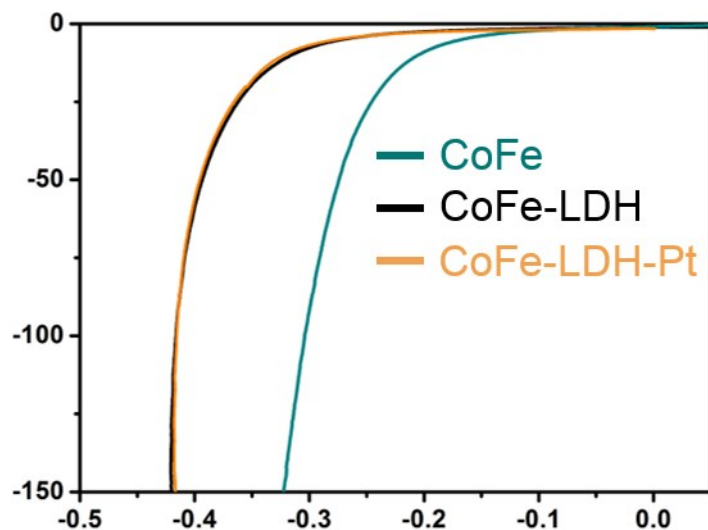

**Figure S3** HER polarization curves of CoFe-LDHs and Pt loaded CoFe-LDHs ( $K_2PtCl_6$  solution directly reacted with CoFe-LDHs).

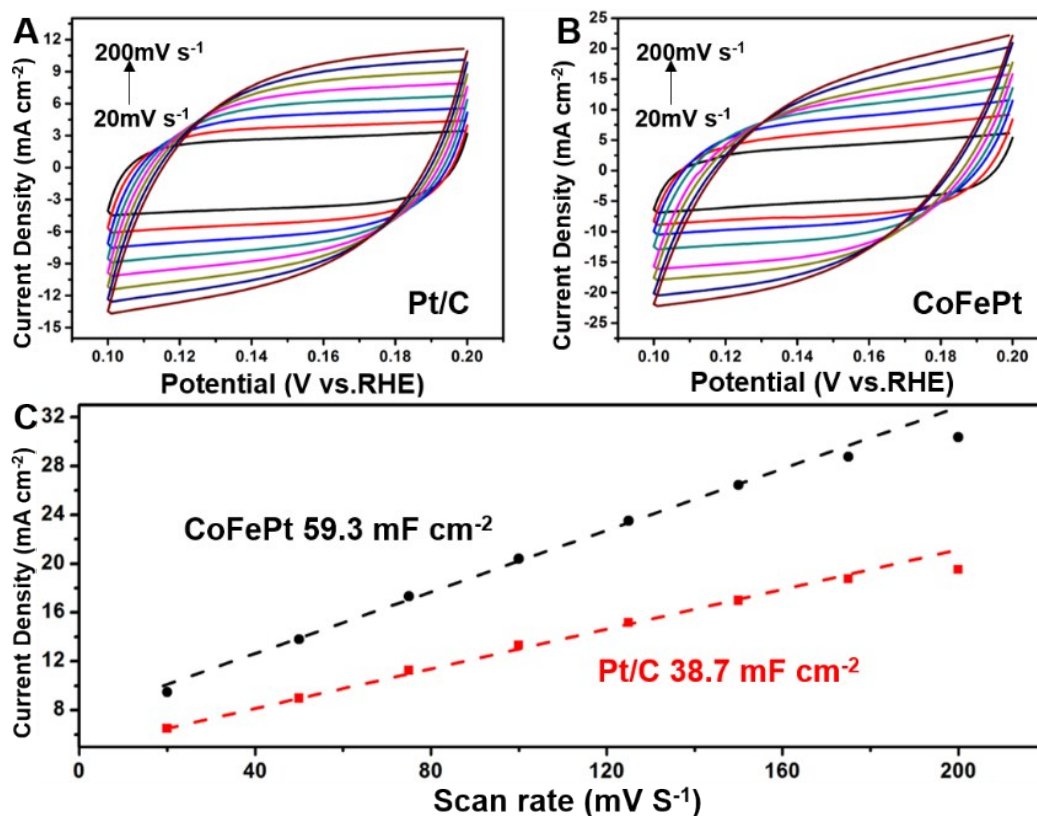

**Figure S4** (A) Cyclic voltammetry curves of Pt/C at different scanning rates. (B) Cyclic voltammetry curves of CoFePt-1% at different scanning rates. (C)  $C_{dl}$  calculations of CoFePt-1% and Pt/C.

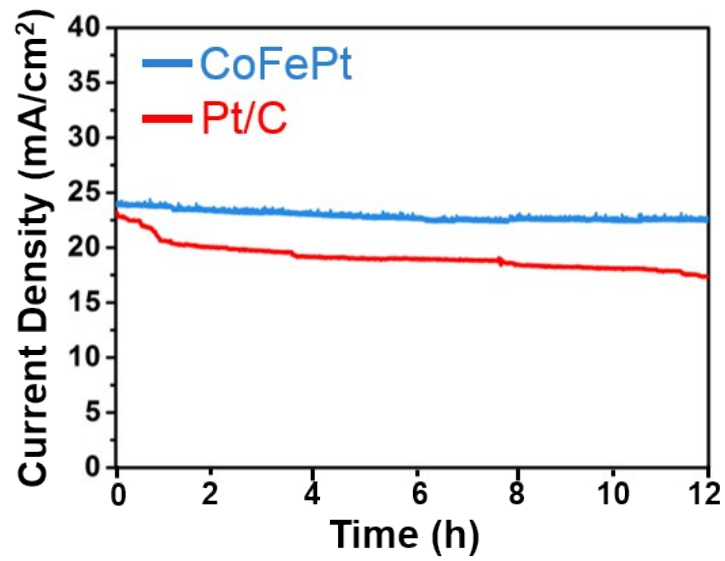

Figure S5 Long-term stability of CoFePt-1% and Pt/C at a constant voltage.

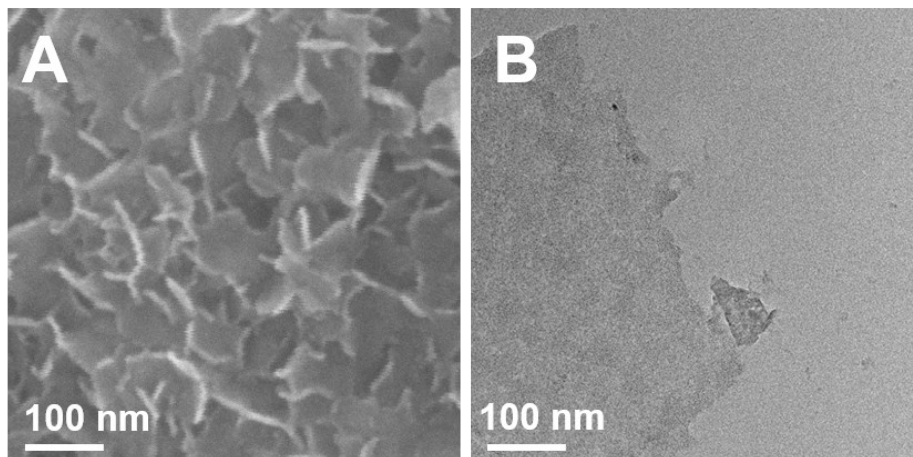

Figure S6 (A) SEM image and (B) HRTEM image of CoFePt-1% after long-term stability test.

Table S1 ICP-OES results of the samples with different Pt contents.

| Sample     | Co (atom%) | Fe (atom%) | Pt (atom%) |
|------------|------------|------------|------------|
| CoFe alloy | 76.42      | 23.58      | \          |
| CoFePt-1%  | 76.19      | 22.63      | 1.18       |
| CoFePt-3%  | 74.71      | 22.03      | 3.26       |
| CoFePt-5%  | 73.04      | 21.85      | 5.11       |

| Catalysts                                       | Electrolyte                          | Overpotential at 10 mA cm <sup>-2</sup> /mV | Tafel slope /mV dec <sup>-1</sup> | Ref.                                                  |
|-------------------------------------------------|--------------------------------------|---------------------------------------------|-----------------------------------|-------------------------------------------------------|
| N-rGO/<br>CoFe-CoFe <sub>2</sub> O <sub>4</sub> | 1 M KOH                              | 190                                         | 100                               | <i>Carbon</i> <b>2018</b> , 139,35                    |
| CoFe@N-rGO                                      | 1 M KOH                              | 116                                         | 78                                | <i>J. Mater. Chem. A</i> <b>2018</b> , 6, 32          |
| NiCo <sub>2</sub> S <sub>4</sub> /Ni foam       | 1 M KOH                              | 65                                          | 84.5                              | <i>Nano Energy</i> , <b>2016</b> , 24, 139            |
| Co-Fe-P nanotubes                               | 1 M KOH                              | 86                                          | 59                                | <i>Nano Energy</i> <b>2019</b> , 56, 225              |
| CoFe-NC                                         | 1 M KOH                              | 202                                         | 67.96                             | <i>J. Power Sources</i> <b>2018</b> , 389, 249        |
| Co/Co <sub>3</sub> O <sub>4</sub> nanosheets    | 1 M KOH                              | 105                                         | 44                                | <i>Nano Lett.</i> <b>2015</b> , 15, 6015              |
| Co-Fe-P nanosheets                              | 0.5 M H <sub>2</sub> SO <sub>4</sub> | 41                                          | 31.5                              | <i>Appl. Surf. Sci.</i> <b>2019</b> , 1, 478          |
| CoP nanosheets                                  | 1 M KOH                              | 94                                          | 42                                | <i>Angew. Chem., Int. Ed.</i> <b>2015</b> , 127, 6349 |
| CoFePt-1% nanosheets                            | 1 M KOH                              | 18                                          | 29                                | This work                                             |

**Table S2** Hydrogen evolution reaction performance of CoFePt-1% nanosheets compare to other electrocatalysts.
